# Supplementary material for: In situ grown Nb4N5 nanocrystal on nitrogen-doped graphene as a novel anode for lithium ion battery
Source: Royal Society of Chemistry journal article supplement (doi:10.1039/c6ra13647h), 2016-01-01
Supplement: c6ra13647h1.pdf [file c6ra13647h1.pdf]

## Supporting information

### ***In-situ* grown Nb<sub>4</sub>N<sub>5</sub> nanocrystal on nitrogen-doped graphene as a novel anode for lithium ion battery**

*Chenlong Dong<sup>a,c</sup>, Xin Wang<sup>a</sup>, Xiangye Liu<sup>a</sup>, Xiaotao Yuan<sup>a</sup>, Wujie Dong<sup>a</sup>, Houlei Cui<sup>b</sup>, Yuhang Duan<sup>c</sup>, Fuqiang Huang<sup>a, b,\*</sup>*

<sup>a</sup> State Key Laboratory of Rare Earth Materials Chemistry and Applications and National Laboratory, College of Chemistry and Molecular Engineering, Peking University, Beijing 100871, P.R. China

<sup>b</sup> State Key Laboratory of High Performance Ceramics and Superfine Microstructures, Shanghai Institute of Ceramics, Chinese Academy of Sciences, Shanghai 200050, P.R. China

<sup>c</sup> Faculty of Science, Applied Chemistry Program, Beijing University of Chemical Technology, Beijing 100029, P.R. China.

## Experimental section

**Fabrication of graphene oxide (GO):** 3 g graphite powder was added to 360 mL concentrated sulfuric acid and 40 mL phosphoric acid in an ice-bath with vigorously stirring for 30 min. Then, 18 g potassium permanganate was slowly added to the above solution and stirred for 1 h. Then, the mixture was maintained at 50 °C for 12 h. The resultant bright yellow suspension was poured into a 1000 mL flask contained 400 g ice, following by adding 3 mL H<sub>2</sub>O<sub>2</sub> solution which reduces residual MnO<sub>4</sub><sup>-</sup> to Mn<sup>2+</sup>. The precipitate was transferred into dialysis and carried out by dialysing in DI water in order to remove the residual Na<sup>+</sup>, K<sup>+</sup>, SO<sub>4</sub><sup>2-</sup> and other ions. Last, the precipitation was treated by vacuum drying for 48 h.

## TG-DSC analysis

The initial weight of sample is 5.3724 mg and the last weight is 5.3817 mg. We assume that the the weight of Nb<sub>4</sub>N<sub>5</sub> is  $x$  mg and the N-G is  $y$  mg. So  $x + y = 5.3724$  mg. From ca. 150 to ca. 400 °C, the weight increases because the 1 molecular Nb<sub>4</sub>N<sub>5</sub> is oxidated to be 2 molecular Nb<sub>2</sub>O<sub>5</sub>. The weight decreases from ca. 400 to ca.800 °C due to the combustion of N-G and the oxidation of Nb<sub>4</sub>N<sub>5</sub>. The molecular weight of Nb<sub>4</sub>N<sub>5</sub> is 441.6592 g mol<sup>-1</sup> and the molecular weight of Nb<sub>2</sub>O<sub>5</sub> is 265.8098 g mol<sup>-1</sup>. The oxidation of Nb<sub>4</sub>N<sub>5</sub> can lead that the weight (except N-G) increases to be 1.2037  $x$  mg (Nb<sub>2</sub>O<sub>5</sub>). Around 800 °C, the combustion finish and the oxidation complete. The result indicates that 1.2037  $x = 5.3817$  mg. So  $x = 4.4710$  mg and  $y = 0.9014$  mg. The content of N-G in Nb<sub>4</sub>N<sub>5</sub>/N-G is about 16.78 %.

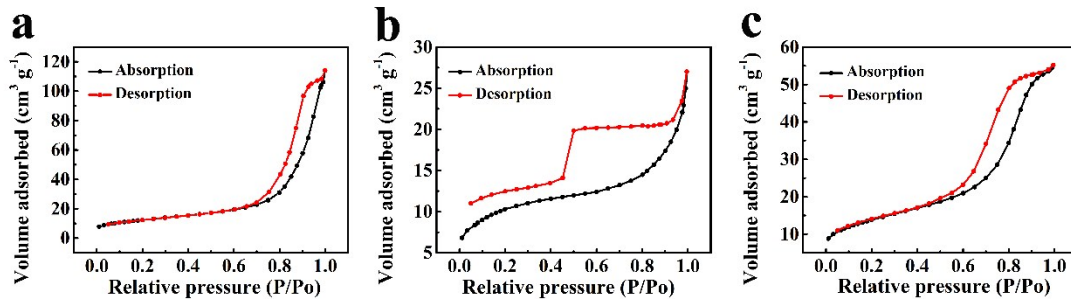

**Figure S1.** N<sub>2</sub> sorption isotherm of (a) bare Nb<sub>4</sub>N<sub>5</sub>, (b) N-G and (c) Nb<sub>4</sub>N<sub>5</sub>/N-G.

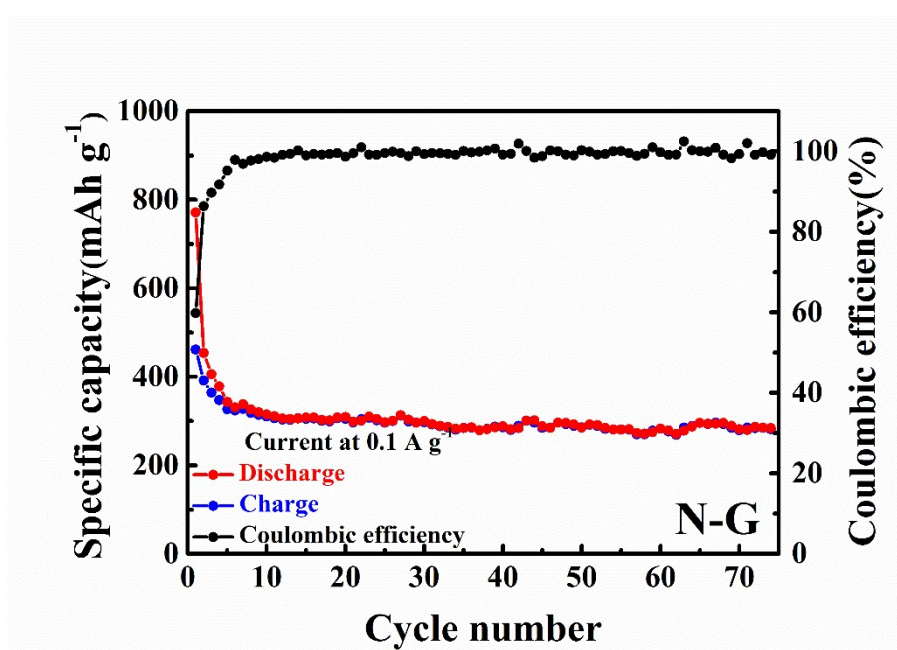

**Figure S2.** Cycle performance and coulombic efficiency of N-G at 0.1 A g<sup>-1</sup> (0.0832 mA cm<sup>-2</sup>).
